# Supplementary material for: Ion channels and regulation of insulin secretion in human β-cells: A computational systems analysis
Source: PubMed Central journal article supplement — Islets. 2013 Jan 1;5(1):1–15. doi: 10.4161/isl.24166 (PMC3662377; doi:10.4161/isl.24166), 2013-01-01
Supplement: isl-5-1-s01.pdf [file isl-5-1-s01.pdf]

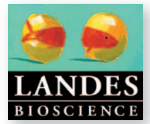

## **Supplemental Material to:**

**Leonid E. Fridlyand, David A. Jacobson, L.H. Philipson**

**Ion channels and regulation of insulin secretion in human  
 $\beta$  cells: A computational systems analysis**

**Islets 2012; 5(1)**

**<http://dx.doi.org/10.4161/isl.24166>**

**<http://www.landesbioscience.com/journals/islets/article/24166>**

## **Supplementary Material**

### **Ion channels and regulation of insulin secretion in human beta-cells. A computational systems analysis**

**L.E. Fridlyand<sup>1</sup>, D. A. Jacobson<sup>2</sup> and L. H. Philipson<sup>1</sup>**

<sup>1</sup> Department of Medicine, University of Chicago, Chicago, IL, USA

<sup>2</sup> Department of Molecular Physiology and Biophysics, Vanderbilt University, Nashville, TN, USA

## Appendix 1.

### Computational model of membrane potential modulation of insulin secretion.

A schematic diagram of the biochemical steps,  $\text{Ca}^{2+}$  handling, channels and mechanisms of IS regulation in  $\beta$ -cell is presented in Fig 1 in text. The data used to fit the computational model in our study were taken where possible from isolated human  $\beta$ -cells and islets. Since human pancreatic  $\beta$ -cells remain incompletely understood, there remain gaps in any completely  $\beta$ -cell specific data set. For the purpose of making a convenient model we have chosen plausible suggestions of mechanisms of regulation and parameters from rodent  $\beta$ -cells or other cell types to close the gaps.

#### 1. Channels and their mathematical description

The electrophysiological behavior of a single  $\beta$ -cell can be described with the following current balance differential equation

$$-C_m \frac{dV_p}{dt} = I_{\text{Na}} + I_{\text{CaL}} + I_{\text{CaP}} + I_{\text{CaT}} + I_{\text{PCa}} + I_{\text{KDr}} + I_{\text{KCaB}} + I_{\text{KCa}} + I_{\text{Kher}} + I_{\text{KATP}} + I_{\text{Nab}} \quad (1)$$

where  $V_p$  is the plasma membrane potential,  $t$  is time,  $C_m$  is the whole-cell membrane capacitance,  $I_{\text{Na}}$  is the voltage-gated  $\text{Na}^+$  current,  $I_{\text{CaL}}$  and  $I_{\text{CaP}}$  are high-voltage-activated “L- and P/Q-type”  $\text{Ca}^{2+}$  currents,  $I_{\text{CaT}}$  is the low-voltage-activated “T-type”  $\text{Ca}^{2+}$  current,  $I_{\text{PCa}}$  is the plasma membrane  $\text{Ca}^{2+}$ -pump current,  $I_{\text{KDr}}$  is the rapid delayed-rectifier  $\text{K}^+$  current,  $I_{\text{KCaB}}$  is the  $\text{Ca}^{2+}$  and high voltage-activated  $\text{K}^+$  (BK-like) current,  $I_{\text{KCa}}$  is the  $\text{Ca}^{2+}$  activated  $\text{K}^+$  (SK-like) current,  $I_{\text{Kher}}$  is the human-ERG  $\text{K}^+$  channel current,  $I_{\text{KATP}}$  is the ATP-sensitive  $\text{K}^+$  channel current and  $I_{\text{Nab}}$  is the  $\text{Na}^+$  background current (Fig. 1 in text). Mathematical description of currents is represented in Appendix 2.

#### 2. Mathematical description of $\text{Ca}^{2+}$ dynamics

$\text{Ca}^{2+}$  enters into cells through  $\text{Ca}^{2+}$  channels and is removed by  $\text{Ca}^{2+}$  pumps and exchangers.  $\text{Ca}^{2+}$  handling can also include ER and mitochondrial sequestration. Including only fluxes through  $\text{Ca}^{2+}$

channels and  $\text{Ca}^{2+}$  pumps on PM, the equations for free cytoplasmic  $\text{Ca}^{2+}$  ( $[\text{Ca}^{2+}]_c$ ) dynamics can be written as follows:

$$\frac{d[\text{Ca}^{2+}]_c}{dt} = \frac{f_{ci} (-I_{\text{CaL}} - I_{\text{CaT}} - I_{\text{CaP}} - 2 I_{\text{PCa}})}{2 F V_c} - k_{\text{sg}} [\text{Ca}^{2+}]_c \quad (2)$$

where  $f_{ci}$  is the fraction of free  $\text{Ca}^{2+}$  in cytoplasm,  $F$  is Faraday's constant,  $V_c$  is the effective volumes of the cytosolic compartment, and  $k_{\text{sg}}$  is a coefficient of the sequestration rate of  $[\text{Ca}^{2+}]_c$ .

However, detailed data on  $\text{Ca}^{2+}$  dynamics during one spike in human islets is lacking, so we used the coefficients we employed for mouse islets<sup>1</sup> (Table S1).

### 3. Insulin release

We model the electrophysiological events inside one cell and also describe granule exocytosis for one cell. We represent the long-term insulin release in its simplest form as the dependence both on  $\text{Ca}^{2+}$  influx through specific non-L-type  $\text{Ca}^{2+}$  channels and  $[\text{Ca}^{2+}]_c$  as in our models for “immediate fusion” of insulin granules (see for details<sup>2</sup>) and glucagon secretion.<sup>3</sup> Then a rate of relative IS for one cell can be written as

$$f_{\text{is}} = f_{\text{VCa}} f_{\text{iCa}} + k_{\text{re}} \quad (3)$$

$$f_{\text{VCa}} = (-k_{\text{ci}} I_{\text{CaP}}/F) \quad (4)$$

$$f_{\text{iCa}} = [\text{Ca}^{2+}]_c^{\text{hiCa}} / (K_{\text{iCa}}^{\text{hiCa}} + [\text{Ca}^{2+}]_c^{\text{hiCa}}) \quad (5)$$

where  $f_{\text{is}}$  is the rate of exocytosis in one cell;  $f_{\text{VCa}}$  is the activation function of non-L-type  $\text{Ca}^{2+}$  channels, where  $k_{\text{ci}}$  is the stoichiometric coefficient and  $I_{\text{CaP}}/F$  is the  $\text{Ca}^{2+}$  influx through specific VGCCs (P/Q-type  $\text{Ca}^{2+}$  channels in this work);  $f_{\text{iCa}}$  is the calcium potentiating factor, where  $K_{\text{iCa}}$  is the half-maximum  $\text{Ca}^{2+}$  activation constant and  $\text{hiCa}$  is the Hill coefficient and  $k_{\text{re}}$  is the rate coefficient for insulin production under resting conditions (in hyperpolarized cells).

To express the experimentally measured rates of long-term IS we should take into account all  $\beta$ -cells in all islets. For simplification we propose that insulin release occurs in numerous  $\beta$ -cells which have similar properties. For example, in a hypothetical perfusion experiment where one islet

is localized in a perfusion chamber, the insulin concentration in media surrounding this islet and the rate of insulin release from this chamber can be written as in article<sup>3</sup>

$$d [\text{In}]_s / dt = f_{si} N_i / V_{pi} - k_{pi} [\text{In}]_s \quad (6)$$

$$I_s = k_{si} k_{pi} [\text{In}]_s \quad (7)$$

where  $[\text{In}]_s$  is the relative insulin concentration in medium,  $f_{si}$  is the rate of exocytosis in one cell,  $N_i$  is the amount of  $\beta$ -cells in one islet,  $V_{pi}$  is the volume of the chamber,  $k_{pi}$  is the perfusion coefficient,  $I_{sr}$  is the relative insulin secretion rate in the perfusion experiment,  $k_{si}$  is the scaling coefficient.

Human islets contain a substantially higher proportion of  $\alpha$ - and  $\delta$ -cells than rodent islets.<sup>4-5</sup> Estimated that an “average” islet has about 1000 cells<sup>6</sup> we suggested that the number of  $\beta$ -cells in one islet (coefficient  $N_i$  in Eq. 6) is about 600. We have used relative units for our comparative simulations of  $[\text{In}]_s$  and  $I_s$  and fit the coefficients for insulin release in Table S1 suggesting that mean relative insulin concentration in chamber and relative  $I_s$  are about 1 at high glucose levels in our hypothetical perfusion experiment (see Fig. 3 in text).

#### 4. Computational model

We have constructed the computational model of insulin secretion in human  $\beta$ -cells as the complex of the differential equations for the regulation of PM potential (Eq. 1),  $\text{Ca}^{2+}$  handling (Eq.2),  $[\text{In}]_s$  (Eq. 6) and the voltage-dependent gating variables for channels (see Appendix 2). The influence of glucose was modeled as the changes in ATP/ADP ratio that determines  $K_{ATP}$  channel opening.

Precise determination of the model coefficients is limited due to a lack of adequately experimental data. Therefore, the model parameters were evaluated from the literature when possible and were also found by fitting a set of known experimental data as an important reality-test. Equations and parameter values (Table S1 and S2) contain all the information necessary to carry out the simulations presented in this paper and are pointed out in the text as a simulation at basal levels. In some cases, when the values of parameters differed from those at basal level the values assigned are noted in the text or in the corresponding figure legends. To calculate persistent

cellular parameters, the model was allowed to run up to steady values without changes in coefficients.

The units, except where indicated otherwise, are: time in milliseconds (ms), voltage in millivolts (mV), concentration in micromoles/liter ( $\mu\text{M}$ ), current in femtoamperes (fA), conductance in picosiemens (pS), capacitance in femtofarads (fF).

Numerical integration was carried out using standard numerical methods. Simulations were performed using the software environment “Virtual Cell”<sup>7</sup>. This model is available for direct simulation on the website “Virtual Cell” ([www.nrcam.uchc.edu](http://www.nrcam.uchc.edu)) in “MathModel Database” on the “math workspace” in the library “Fridlyand” with the name “Human\_Beta\_cell”. Visualization and graphical analysis were performed using “Excel”.

**TABLE S1. Cell and membrane current parameters**

| Parameter | Definition                                                    | Value   | Units     | Equation | Reference         |
|-----------|---------------------------------------------------------------|---------|-----------|----------|-------------------|
| $C_m$     | Membrane capacitance                                          | 9,990   | fF        | 1        | 8                 |
| $V_c$     | Cytosol volume                                                | 0.764   | pL        | 2        | 9                 |
| $f_{ci}$  | Fraction of free $Ca^{2+}$ in cytoplasm                       | 0.005   | UI        | 2        | f                 |
| $F$       | Faraday constant                                              | 96,487  | C/mol     | 2        | Physical constant |
| $k_{sg}$  | Coefficient of the sequestration rate of $[Ca^{2+}]_c$        | 0.00001 | $ms^{-1}$ | 2        | 9                 |
| $k_{re}$  | Coefficient of relative insulin production in rest conditions | 0.00073 | $ms^{-1}$ | 3        | f                 |
| $k_{ci}$  | Stoichiometric coefficient                                    | 2       | UI        | 4        | f                 |
| $K_{iCa}$ | Half-maximum $Ca^{2+}$ activation constant                    | 0.2     | $\mu M$   | 5        | f                 |
| $h_{iCa}$ | Hill coefficient                                              | 2       | UI        | 5        | f                 |
| $N_i$     | Amount of $\beta$ -cells in one islet                         | 600     | UI        | 6        | f                 |
| $V_{pi}$  | Relative volume of the chamber                                | 45000   | UI        | 6        | f                 |
| $k_{pi}$  | Perfusion coefficient.                                        | 0.0001  | $ms^{-1}$ | 7        | f                 |
| $k_{si}$  | Scaling coefficient                                           | 10000   | UI        | 7        | f                 |

f, adjusted to fit the experimental values; UI, unitless

## Appendix 2.

### Mathematical modeling of ion channels

This section details the equations and parameters utilized in the simulations of human  $\beta$ -cell action potential. A conventional Hodgkin-Huxley-type model was used for voltage-gated  $\text{Ca}^{2+}$ ,  $\text{Na}^+$  and  $\text{K}^+$  channels as it was used in our previous model that described spike activity in mouse  $\beta$ -cells.<sup>1</sup> Boltzman-type equations are employed for steady-state activation and inactivation functions. Coefficients used in the model were either adopted from previous models<sup>1, 9-11</sup> or are described here (Tables S1 and S2). While some aspects of human  $\beta$ -cell physiology and pharmacology have been reported, many quantities, like the measurement of the individual  $\text{K}^+$ ,  $\text{Na}^+$  and  $\text{Ca}^{2+}$  channel contributions to the overall  $V_p$  responses during AP generation, the time constants for channel's parameters and others have not been determined experimentally. The parameters for which there are no specific experimental data were chosen during preliminary simulations to produce a close fit to experimentally observed I-V relations for corresponding currents and to reproduce reasonable picture of AP firing in different experimental conditions (see Secs. 4-7 in text for simulations). However, all parameters and constants were fitted to be in their physiological ranges.

#### 1. Voltage-gated $\text{Na}^+$ current ( $I_{\text{Na}}$ ) (Figure S1)

The classic formulation for the  $I_{\text{Na}}$  current assumes that the  $\text{Na}^+$  conductance is controlled by the product of the activation variable ( $d_{\text{Na}}$ ) and the fast inactivation gating variable ( $f_{\text{Na}}$ )<sup>12</sup> that we also used. Coefficients for steady-state activation and inactivation variable curves were fitted to have a bell-shaped peak current voltage dependence with activation near -30 mV and the maximal height at 0 mV for of human  $\text{Na}^+$  channels in  $\beta$ -cells<sup>8, 13-14</sup> (Fig. S1C and Table S2). Values of the time constants for the gating variable have not been characterized, so we used approximations based on current decay data<sup>8</sup> (Table S2). Additionally, the voltage-independent coefficient ( $k_{\text{Nar}}$ , Eq. A1) was included to analyze a role for hypothetical persistent  $\text{Na}^+$  current (see discussion in Sec. 6.2). This coefficient was accepted as zero at basal set of coefficients in Table S2. Then

$$I_{\text{Na}} = g_{\text{mNa}} (d_{\text{Na}}^3 f_{\text{Na}} + k_{\text{Nar}}) (V_p - E_{\text{Na}}) \quad (\text{A1})$$



$$\frac{d d_{\text{Na}}}{dt} = \frac{d_{\text{Nai}} - d_{\text{Na}}}{\tau_{d\text{Na}}} \quad (\text{A2})$$

$$d_{\text{Nai}} = \frac{1}{1 + \exp[(V_{d\text{Na}} - V_{\text{P}})/k_{d\text{Na}}]} \quad (\text{A3})$$

$$\frac{d f_{\text{Na}}}{dt} = \frac{f_{\text{Nai}} - f_{\text{Na}}}{\tau_{f\text{Na}}} \quad (\text{A4})$$

$$f_{\text{Nai}} = \frac{1}{1 + \exp[-(V_{f\text{Na}} - V_{\text{P}})/k_{f\text{Na}}]} \quad (\text{A5})$$

Our simulations are consistent with the experimental finding from<sup>8</sup> (see Fig. S1).

## 2. L-type $\text{Ca}^{2+}$ current ( $I_{\text{CaL}}$ ) (Figure S2)

$I_{\text{CaL}}$  was modeled similarly as in our model for mouse  $\beta$ -cell<sup>1</sup> with both fast and slow inactivation gating variables (Fig. S2 and Eqs. A6-A13). Due to a lack of experimental data for activation and inactivation time constants for  $I_{\text{CaL}}$  in human  $\beta$ -cells, the formulations from models<sup>1</sup> based on rodent experiments were also used.

$$I_{\text{CaL}} = g_{\text{mCaL}} d_{\text{CaL}} f_{1\text{CaL}} f_{2\text{CaL}} (V_{\text{P}} - E_{\text{Ca}}) \quad (\text{A6})$$

$$\frac{d d_{\text{CaL}}}{dt} = \frac{d_{\text{CaLi}} - d_{\text{CaL}}}{\tau_{d\text{CaL}}} \quad (\text{A7})$$

$$d_{\text{CaLi}} = \frac{1}{1 + \exp[(-V_{d\text{CaL}} - V_{\text{P}})/k_{d\text{CaL}}]} \quad (\text{A8})$$

$$\tau_{d\text{CaL}} = 2.2 - 1.79 \cdot \exp[-(V_{\text{p}} - 9.7)/70.2]^2 \quad (\text{A9})$$

$$\frac{d f_{1\text{CaL}}}{dt} = \frac{f_{1\text{CaLi}} - f_{1\text{CaL}}}{\tau_{f1\text{CaL}}} \quad (\text{A10})$$

$$f_{1CaLi} = \frac{1}{1 + \exp[-(V_{f1CaL} - V_P)/k_{f1CaL}]} \quad (A11)$$

$$\frac{d f_{2CaL}}{dt} = \frac{f_{2CaLi} - f_{2CaL}}{\tau_{f2CaL}} \quad (A12)$$

$$f_{2CaLi} = f_{1CaLi} \quad (A13)$$

### 3. P/Q-type $Ca^{2+}$ current ( $I_{CaP}$ ) (Figure S2)

High-voltage-activated P/Q  $Ca^{2+}$  current ( $I_{CaP}$ ) was also found in human  $\beta$ -cells that possess the fast activated and, apparently, only one slow inactivated voltage-gated variable.<sup>8</sup> There were no data available on voltage-dependence for  $I_{CaP}$  activation and inactivation and corresponding time constants in human  $\beta$ -cells so the coefficients from model for  $I_{CaL}$  were partially employed (Eqs. A14-A18). However, the coefficients for the steady-state activation variable curve were fitted to obtain a bell-shaped voltage dependence with activation near -20 mV and a maximal peak current close to 0 mV, as previously reported<sup>8</sup> (see Fig. S2).

$$I_{CaP} = g_{mCaP} d_{CaP} f_{CaP} (V_P - E_{Ca}) \quad (A14)$$

$$\frac{d d_{CaP}}{dt} = \frac{d_{CaPi} - d_{CaP}}{\tau_{dCaP}} \quad (A15)$$

$$d_{CaPi} = \frac{1}{1 + \exp[(-V_{dCaP} - V_p)/k_{dCaP}]} \quad (A16)$$

$$\frac{d f_{CaP}}{dt} = \frac{f_{CaPi} - f_{CaP}}{\tau_{fCaP}} \quad (A17)$$

$$f_{CaPi} = \frac{1}{1 + \exp[-(V_{fCaP} - V_P)/k_{fCaP}]} \quad (A18)$$

### 4. T-type $Ca^{2+}$ current ( $I_{CaT}$ ) (Figure S3)

The activation and inactivation of the  $I_{CaT}$  current was defined similarly to the P-type current. Coefficients for the steady-state activation variable curve were fitted to obtain a bell-shaped voltage dependence with an activation of above -60 mV and a maximal peak current between -40 mV and -30 mV, as previously reported<sup>8</sup> (see Fig. S3).

$$I_{CaT} = g_{mCaT} d_{CaT} f_{CaT} (V_P - E_{Ca}) \quad (A19)$$

$$\frac{d d_{CaT}}{dt} = \frac{d_{CaTi} - d_{CaT}}{\tau_{dCaT}} \quad (A20)$$

$$d_{CaTi} = \frac{1}{1 + \exp[(V_{dCaT} - V_P)/k_{dCaT}]} \quad (A21)$$

$$\frac{d f_{CaT}}{dt} = \frac{f_{CaTi} - f_{CaT}}{\tau_{fCaT}} \quad (A22)$$

$$f_{CaT} = f_{CaTi} = \frac{1}{1 + \exp[-(V_{fCaT} - V_P)/k_{fCaT}]} \quad (A23)$$

## 5. Delayed Rectifier $K^+$ current ( $I_{KDr}$ ) (Figure S4A)

Delayed Rectifier  $K^+$  current activates at membrane potential near -30 mV and then increased with the applied voltage, an inactivation was negligible during at least 200 ms depolarization.<sup>15</sup> The conventional Hodgkin-Huxley-type model for  $I_{KDr}$  and some corresponding coefficients was used from our previous mouse  $\beta$ -cell model.<sup>1</sup>

$$I_{KDr} = g_{mDKr} d_{Kr}^2 f_{Kr} (V_P - E_K), \quad (A24)$$

$$\frac{d d_{Kr}}{dt} = \frac{d_{Kri} - d_{Kr}}{\tau_{dKr}} \quad (A25)$$

$$d_{Kri} = \frac{1}{1 + \exp[(V_{DKr} - V_P)/k_{dKr}]} \quad (A26)$$

$$f_{Kri} = 1 \quad (\text{A27})$$

## 6. Voltage-gated $\text{Ca}^{2+}$ -activated $\text{K}^+$ current ( $I_{\text{KCaB}}$ ) (Figure S4B)

The sensitivity of BK channels to  $\text{Ca}^{2+}$  was modeled as previously.<sup>11,16</sup> Here we have also suggested that  $\text{Ca}^{2+}$  concentration is high in microdomains surrounding BK channels when they are functioning during a spike period (see Sec. 5.2). However, the voltage dependence of the activation and inactivation gating variables and time constants were not measured and several published models<sup>11,16</sup> cannot accurately describe the bell-shaped voltage-dependence seen experimentally.<sup>8</sup> For this reason, the coefficients for BK channels were fit to obtain an initial increase in peak amplitude voltage dependence from -40 mV to 20 mV to approximate the published initial part of the peak amplitude (see Fig. 2D,<sup>8</sup>). This is a sufficient approximation for our model where the simulated maximal peak voltage during spikes was less than 20 mV.

$$I_{\text{KCaB}} = g_{\text{mKCaB}} d_{\text{KCaB}}^2 f_{\text{KCaB}} (V_P - E_K), \quad (\text{A28})$$

where

$$\frac{d d_{\text{KCaB}}}{dt} = \frac{d_{\text{KCaBi}} - d_{\text{KCaB}}}{\tau_{d\text{KCaB}}} \quad (\text{A29})$$

$$d_{\text{KCaBi}} = \frac{1}{1 + \exp[(V_{d\text{KCaB}} - V_P)/k_{d\text{KCaB}}]} \quad (\text{A30})$$

where

$$V_{d\text{KCaB}} = V_{\text{BKo}} - k_{\text{shift}} \ln ([\text{Ca}^{2+}]_c / k_{\text{CaBK}}) \quad (\text{A31})$$

$$\frac{d f_{\text{KCaB}}}{dt} = \frac{f_{\text{KCaBi}} - f_{\text{KCaB}}}{\tau_{f\text{KCaB}}} \quad (\text{A32})$$

$$f_{\text{KCaBi}} = \frac{1}{1 + \exp[-(V_{f\text{KCaB}} - V_P)/k_{f\text{KCaB}}]} \quad (\text{A33})$$

## 7. Human-ERG (HERG) current ( $I_{Kher}$ )

We modeled this current similarly<sup>10</sup> using a Hodgkin-Huxley-type model with slow activation and deactivation voltage-gated variables:

$$I_{Kher} = g_{mKhe} d_{Khe} f_{Khe} (V_P - E_K), \quad (A34)$$

$$\frac{d d_{Khe}}{dt} = \frac{d_{Khei} - d_{Khe}}{\tau_{dKhe}} \quad (A35)$$

$$d_{Khei} = \frac{1}{1 + \exp(V_{dKhe} - V_p) k_{dKhe}} \quad (A36)$$

$$\frac{d f_{Khe}}{dt} = \frac{f_{Khei} - f_{Khe}}{\tau_{fKhe}} \quad (A37)$$

$$f_{Khei} = \frac{1}{1 + \exp[-(V_{fKhe} - V_p)/k_{fKhe}]} \quad (A38)$$

## 8. Voltage-independent $Ca^{2+}$ -activated $K^+$ current ( $I_{KCa}$ )

We included the equation for a calcium-activated  $K^+$  current ( $I_{KCa}$ ) from our previous model.<sup>1</sup>

$$I_{KCa} = g_{mKCa} d_{KCa} (V_p - E_K), \quad (A39)$$

where

$$d_{KCa} = \frac{[Ca^{2+}]_c^4}{[Ca^{2+}]_c^4 + K_{KCa}^4} \quad (A40)$$

## 9. ATP-sensitive $K^+$ channels current ( $I_{KATP}$ )

For ATP-sensitive  $K^+$  channels current ( $I_{KATP}$ ) we adopted a kinetic model<sup>1,9</sup> for the value of whole-cell  $K_{ATP}$  channel conductance.

$$I_{KATP} = g_{mKATP} O_{KATP} (V_P - E_K), \quad (A41)$$

where

$$O_{KATP} = \frac{0.08 (1 + 2 [\text{MgADP}_f]_c / k_{dd}) + 0.89 ([\text{MgADP}_f]_c / k_{dd})^2}{(1 + [\text{MgADP}_f]_c / k_{dd})^2 (1 + 0.45 [\text{MgADP}_f]_c / k_{td} + [\text{ATP}_f]_c / k_{tt})} \quad (\text{A42})$$

$$[\text{MgADP}_f]_c = 0.55 [\text{ADP}_f]_c \quad (\text{A43})$$

where  $O_{KATP}$  is the fraction of open  $K_{ATP}$  channels,  $\text{MgADP}_f$  is free Mg-bound ADP,  $[\text{ATP}_f]_c$  and  $[\text{ADP}_f]_c$  are free ATP and ADP concentrations in cytoplasm;  $k_{dd}$ ,  $k_{td}$  and  $k_{tt}$  are coefficients.

### 10. Plasma membrane $\text{Ca}^{2+}$ pump current ( $I_{pCa}$ )

The corresponding equation was adapted from previous models.<sup>1,9</sup>

$$I_{pCa} = P_{mCap} \frac{[\text{Ca}^{2+}]_c^2}{[\text{Ca}^{2+}]_c^2 + K_{Cap}^2} \quad (\text{A44})$$

### 11. $\text{Na}^+$ background current ( $I_{Nab}$ )

In addition to the voltage-gated  $\text{Na}^+$  current described above, the model contains  $\text{Na}^+$  background (leak) current (see Sec. 6.3). We simulated it as previously for mouse  $\beta$ -cell electrical activity (see for details.<sup>1,9</sup>

$$I_{Nab} = g_{bNa} (V_P - E_{Na}) \quad (\text{A45})$$

**TABLE S2. Cell and membrane current parameters (Appendix 2)**

| Parameter      | Definition                                | Value     | Equation | Reference |
|----------------|-------------------------------------------|-----------|----------|-----------|
| $g_{mNa}$      | Conductance of $I_{Na}$                   | 10,000 pS | A1       | f         |
| $E_{Na}$       | Reversal potential for $Na^+$             | 70 mV     | –        | 9         |
| $k_{Nar}$      | Coefficient for persistent $Na^+$ current | 0         | –        | f         |
| $\tau_{dNa}$   | Time constant for $d_{Na}$                | 0.1 ms    | A2       | f         |
| $V_{dNa}$      | Half-activation potential                 | -30 mV    | A3       | f         |
| $k_{dNa}$      | Slope of half-activation potential        | 10 mV     | –        | f         |
| $\tau_{fNa}$   | Time constant for $f_{Na}$                | 0.5 ms    | A4       | f         |
| $V_{fNa}$      | Half-inactivation potential               | -42 mV    | A5       | 8         |
| $k_{fNa}$      | Slope of half-inactivation potential      | 6 mV      | –        | 8         |
| $g_{mCaL}$     | Conductance for $I_{CaL}$                 | 2700 pS   | A6       | f         |
| $E_{Ca}$       | Reversal potential for $Ca^{2+}$ current  | 100 mV    | –        | 9         |
| $V_{dCaL}$     | Half-activation potential                 | -15 mV    | A8       | f         |
| $k_{dCaL}$     | Slope of half-activation potential        | 8 mV      | –        | f         |
| $\tau_{f1CaL}$ | Time constant for $f_{1CaL}$              | 6.8 ms    | A10      | 8         |
| $V_{f1CaL}$    | Half-inactivation potential               | -25 mV    | A11      | f         |
| $k_{f1CaL}$    | Slope of half-inactivation potential      | 8 mV      | –        | 9         |
| $\tau_{f2CaL}$ | Time constant for $f_{2L}$                | 65 ms     | A124     | 8         |
| $g_{mCaP}$     | Conductance for $I_{CaP}$                 | 1200 pS   | A14      | f         |
| $\tau_{dCaP}$  | Time constant for $d_{CaP}$               | 0.41 ms   | A15      | f         |
| $V_{dCaP}$     | Half-activation potential                 | -5 mV     | A16      | f         |

|                |                                           |             |     |               |
|----------------|-------------------------------------------|-------------|-----|---------------|
| $k_{dCaP}$     | Slope of half-activation potential        | 6 mV        | –   | f             |
| $\tau_{fCaP}$  | Time constant for $f_{CaP}$               | 65 ms       | A17 | f             |
| $V_{fCaP}$     | Half-inactivation potential               | -25 mV      | A18 | f             |
| $k_{fCaP}$     | Slope of half-inactivation potential      | 8 mV        | –   | f             |
| $g_{mCaT}$     | Maximum conductance for $I_{CaT}$         | 250 pS      | A19 | f             |
| $\tau_{dCaT}$  | Time constant for $d_{CaT}$               | 0.41 ms     | A20 | <sup>8</sup>  |
| $V_{dCaT}$     | Half-activation potential                 | -50 mV      | A21 | f             |
| $k_{dCaT}$     | Slope of half-activation potential        | 6 mV        | –   | f             |
| $\tau_{fCaT}$  | Time constant for $f_{CaT}$               | 6.8 ms      | A22 | <sup>8</sup>  |
| $V_{fCaT}$     | Half-inactivation potential               | -64 mV      | A23 | <sup>8</sup>  |
| $k_{fCaT}$     | Slope of half-inactivation potential      | 8 mV        | –   | <sup>8</sup>  |
| $g_{mKDr}$     | Maximum conductance for $I_{DKr}$         | 18,000 pS   | A24 | f             |
| $E_K$          | Reversal potential for $K^+$ current      | -75 mV      | –   | <sup>9</sup>  |
| $\tau_{dKr}$   | Time constant for $d_{Kr}$                | 20 ms       | A25 | f             |
| $V_{dKr}$      | Half-activation potential                 | -9 mV       | A26 | <sup>9</sup>  |
| $k_{dKr}$      | Slope of half-activation potential        | 8 mV        | –   | f             |
| $g_{mKCaB}$    | Maximum conductance for $I_{KCaB}$        | 25,000 pS   | A28 | f             |
| $\tau_{dKCaB}$ | Time constant for $d_{KCaB}$              | 1.9 ms      | A29 | <sup>8</sup>  |
| $k_{dKCaB}$    | Slope of half-activation potential        | 30 mV       | A31 | f             |
| $K_{CaBK}$     | $Ca^{2+}$ binding constant for $I_{KCaB}$ | 1.5 $\mu$ M | A31 | <sup>11</sup> |
| $V_{BKo}$      | Constant                                  | 0.1 mV      | –   | <sup>11</sup> |
| $k_{shift}$    | Voltage-shift constant                    | 18 mV       | –   | <sup>11</sup> |



|                |                                                           |              |     |    |
|----------------|-----------------------------------------------------------|--------------|-----|----|
| $\tau_{fKCaB}$ | Time constant for $f_{KCaB}$                              | 22.6 ms      | A32 | 8  |
| $V_{fKCaB}$    | Half-inactivation potential                               | 30 mV        | A33 | f  |
| $k_{fKCaB}$    | Slope of half-inactivation potential                      | 9.2 mV       | –   | f  |
| $g_{mKhe}$     | Maximum conductance for $I_{Kher}$                        | 200 pS       | A34 | f  |
| $\tau_{dKhe}$  | Time constant for $d_{Khe}$                               | 100 ms       | A35 | 10 |
| $V_{dhe}$      | Half-activation potential                                 | -30 mV       | A36 | 10 |
| $k_{dhe}$      | Slope of half-activation potential                        | 10 mV        | –   | 10 |
| $\tau_{fKhe}$  | Time constant for $f_{Khe}$                               | 50 ms        | A37 | 10 |
| $V_{fhe}$      | Half-inactivation potential                               | -42 mV       | A38 | 10 |
| $k_{fhe}$      | Slope of half-inactivation potential                      | 17.5 mV      | –   | 10 |
| $g_{mKCa}$     | Maximum conductance for $I_{KCa}$                         | 150 pS       | A39 | f  |
| $K_{KCa}$      | Affinity constant                                         | 0.2 $\mu$ M  | A40 | f  |
| $g_{mKATP}$    | Maximum conductance for $I_{KATP}$                        | 45,000 pS    | A41 | f  |
| $[ADP_f]_c$    | Free ADP concentration in cytoplasm at high glucose level | 15 $\mu$ M   | A42 | f  |
| $[ATP_f]_c$    | Free ATP concentration in cytoplasm                       | 3600 $\mu$ M | –   | f  |
| $k_{dd}$       | Dissociation constant                                     | 17 $\mu$ M   | –   | 9  |
| $k_{td}$       | Dissociation constant                                     | 26 $\mu$ M   | –   | 9  |
| $k_{tt}$       | Dissociation constant                                     | 50 $\mu$ M   | –   | 9  |
| $P_{mCap}$     | Maximum $I_{Cap}$ current                                 | 5600 fA      | A44 | f  |
| $K_{Cap}$      | Half-maximum $Ca^{2+}$ binding constant for $I_{Cap}$     | 0.3 $\mu$ M  | –   | f  |
| $g_{bNa}$      | Maximum conductance for $I_{Nab}$                         | 10 pS        | A45 | f  |

f, adjusted to fit the experimental values.

## Reference List

1. Fridlyand LE, Jacobson DA, Kuznetsov A, Philipson LH. A model of action potentials and fast Ca<sup>2+</sup> dynamics in pancreatic beta-cells. *Biophys J* 2009; 96:3126-39.
2. Fridlyand LE, Philipson LH. Coupling of metabolic, second messenger pathways and insulin granule dynamics in pancreatic beta-cells: a computational analysis. *Prog Biophys Mol Biol* 2011; 107:293-303.
3. Fridlyand LE, Philipson LH. A computational systems analysis of factors regulating alpha cell glucagon secretion. *Islets* 2012; 4:262-83.
4. Henquin JC, Rahier J. Pancreatic alpha cell mass in European subjects with type 2 diabetes. *Diabetologia* 2011; 54:1720-5.
5. Kilimnik G, Jo J, Periwal V, Zielinski MC, Hara M. Quantification of islet size and architecture. *Islets* 2012; 4:167-72.
6. Rorsman P, Renstrom E. Insulin granule dynamics in pancreatic beta cells. *Diabetologia* 2003; 46:1029-45.
7. Slepchenko BM, Loew LM. Use of virtual cell in studies of cellular dynamics. *Int Rev Cell Mol Biol* 2010; 283:1-56.
8. Braun M, Ramracheya R, Bengtsson M, Zhang Q, Karanauskaite J, Partridge C, et al. Voltage-gated ion channels in human pancreatic beta-cells: electrophysiological characterization and role in insulin secretion. *Diabetes* 2008; 57:1618-28.
9. Fridlyand LE, Tamarina N, Philipson LH. Modeling of Ca<sup>2+</sup> flux in pancreatic beta-cells: role of the plasma membrane and intracellular stores. *Am J Physiol Endocrinol Metab* 2003; 285:E138-54.
10. Pedersen MG. A biophysical model of electrical activity in human beta-cells. *Biophys J* 2010; 99:3200-7.
11. Tsaneva-Atanasova K, Sherman A, van Goor F, Stojilkovic SS. Mechanism of spontaneous and receptor-controlled electrical activity in pituitary somatotrophs: experiments and theory. *J Neurophysiol* 2007; 98:131-44.
12. Hodgkin AL, Huxley AF. A quantitative description of membrane current and its application to conduction and excitation in nerve. *J Physiol* 1952; 117:500-44.
13. Barnett DW, Pressel DM, Misler S. Voltage-dependent Na<sup>+</sup> and Ca<sup>2+</sup> currents in human pancreatic islet beta-cells: evidence for roles in the generation of action potentials and insulin secretion. *Pflugers Arch* 1995; 431:272-82.
14. Misler S, Barnett DW, Gillis KD, Pressel DM. Electrophysiology of stimulus-secretion coupling in human beta-cells. *Diabetes* 1992; 41:1221-8.
15. Dai XQ, Manning Fox JE, Chikvashvili D, Casimir M, Plummer G, Hajmrle C, et al. The voltage-dependent potassium channel subunit Kv2.1 regulates insulin secretion from rodent and human islets independently of its electrical function. *Diabetologia* 2012; 55:1709-20.
16. Chay TR. On the effect of the intracellular calcium-sensitive K<sup>+</sup> channel in the bursting pancreatic beta-cell. *Biophys J* 1986; 50:765-77.

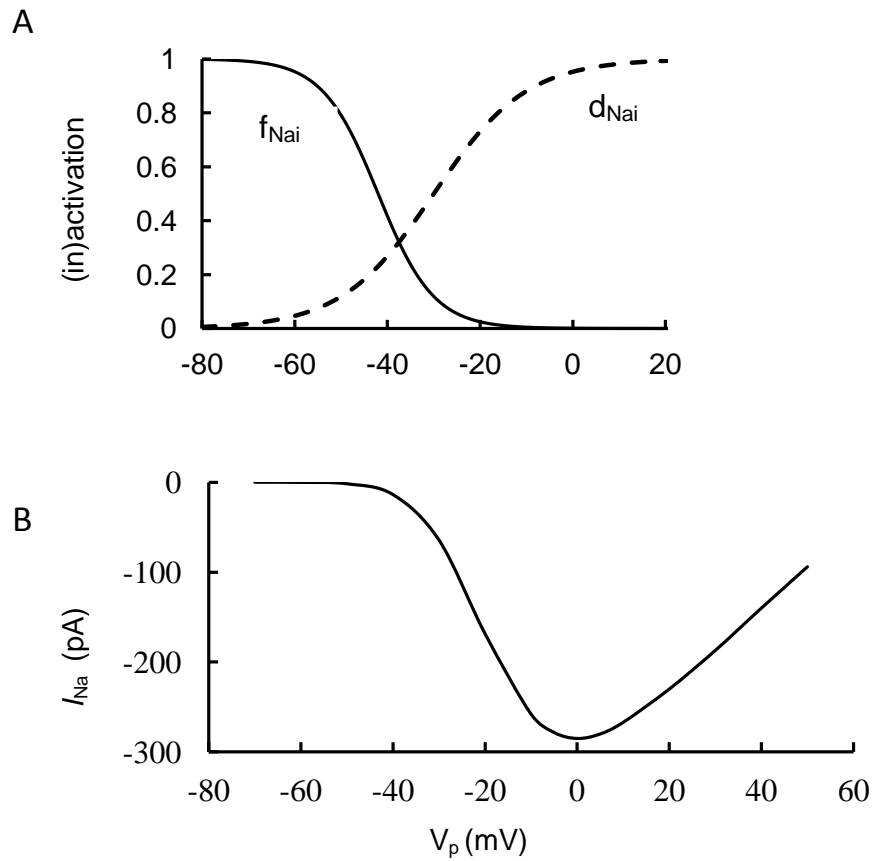

**Figure S1. Tetrodotoxin (TTX) sensitive  $\text{Na}^+$  current ( $I_{\text{Na}}$ ).** A: steady-state activation (— — —  $d_{\text{Nai}}$ ) and inactivation (—  $f_{\text{Nai}}$ ) functions with parameters as in Table S2. B: Simulated peak  $I$ - $V$  relationship of  $I_{\text{Na}}$  obtained from Eqs. A1-A5. Voltage clamp pulses from  $-60$  mV to  $40$  mV from a holding potential of  $-70$  mV were simulated to reproduce the results of Fig. 4C from<sup>8</sup>.

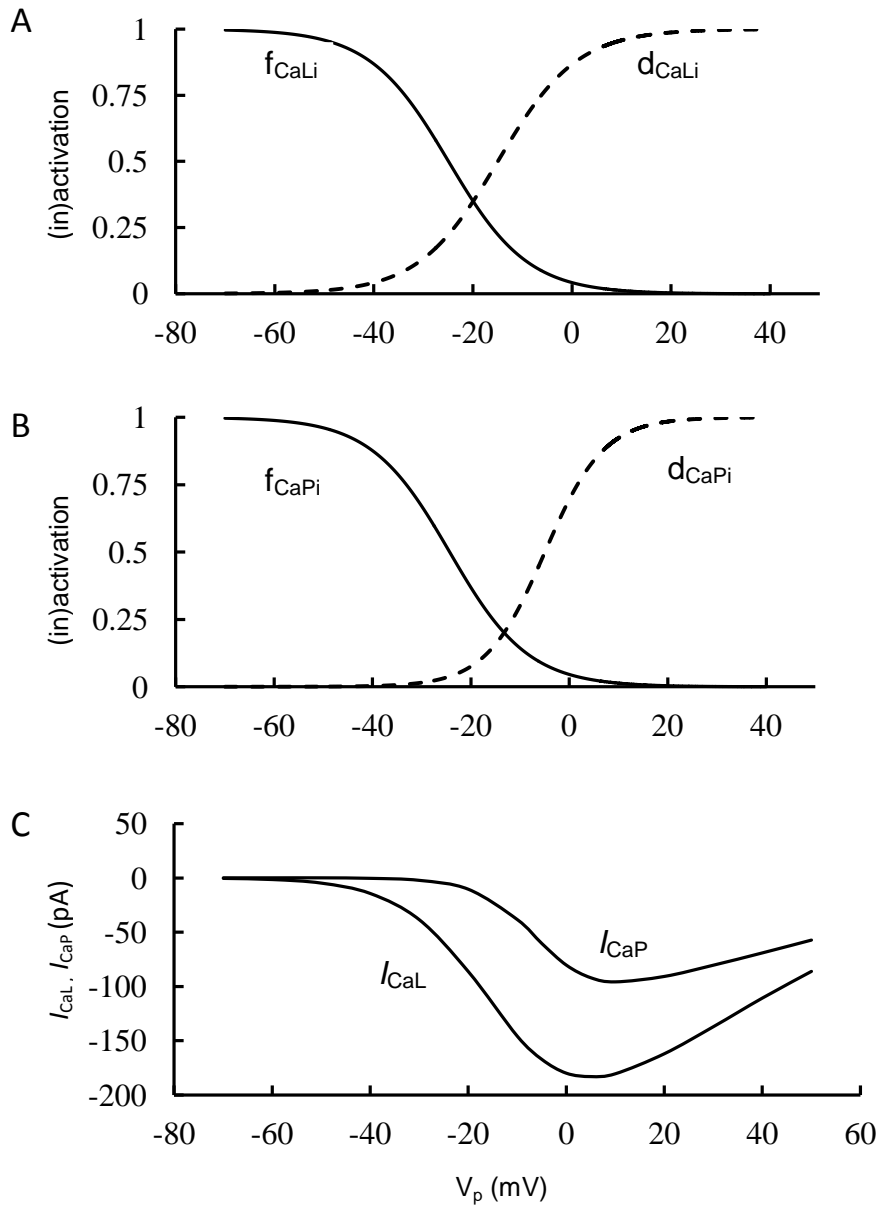

**Figure S2. L and P/Q types  $Ca^{2+}$  current ( $I_{CaL}$  and  $I_{CaP}$ ).** A: A: steady-state activation (— — —  $d_{CaLi}$ ) and inactivation (—  $f_{CaLi}$ ) functions for L-type  $Ca^{2+}$  channels with parameters as in Table S2. (Steady-state inactivation function ( $f_{CaLi}$ ) is similar for fast and slow inactivated voltage-gated variables, see Eq. A13). 2. B: steady-state activation (— — —  $d_{CaPi}$ ) and (—  $f_{CaPi}$ ) inactivation functions for P-type  $Ca^{2+}$  channels with parameters as in Table S2. C. Simulated peak  $I-V$  relationship obtained from Eqs. A6 and A14 with parameters as in Table S2. Voltage clamp pulses from  $-60$  mV to  $50$  mV from a holding potential of  $-70$  mV were simulated to reproduce the experimental conditions (see Fig. 5E from<sup>8</sup>).

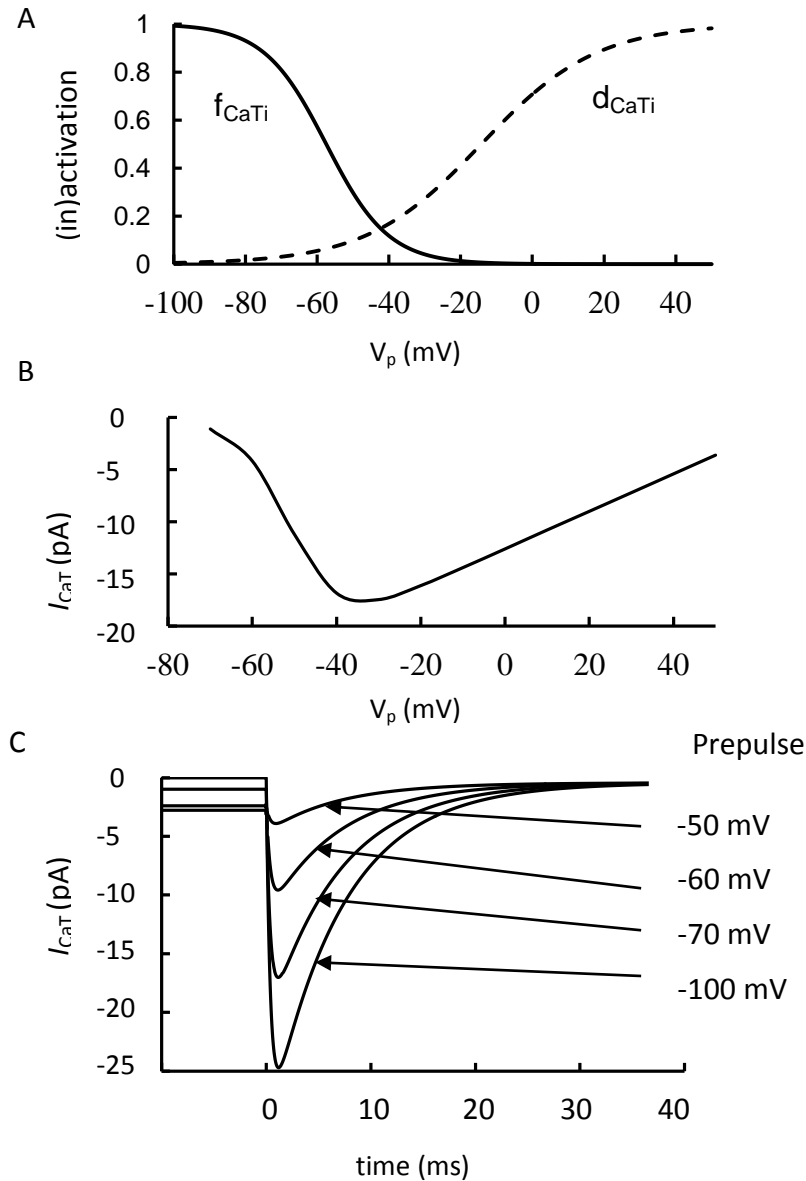

**Figure S3. T-type  $\text{Ca}^{2+}$  current ( $I_{\text{CaT}}$ ).** A: steady-state activation ( $d_{\text{CaTi}}$ ) and inactivation ( $f_{\text{CaTi}}$ ) functions. B: Simulated peak  $I-V$  relationship of  $I_{\text{CaT}}$ . Voltage clamp pulses from  $-60$  mV to  $40$  mV (in  $10$ -mV increment) from a holding potential of  $-70$  mV were simulated to reproduce the experimental conditions (see Fig. 5E from<sup>8</sup>). C: simulated  $I_{\text{CaT}}$  during a test pulse to  $-30$  mV preceded by the prepulses from  $-100$  mV to  $-40$  mV that reproduce the results represented on Fig. 5C from.<sup>8</sup>

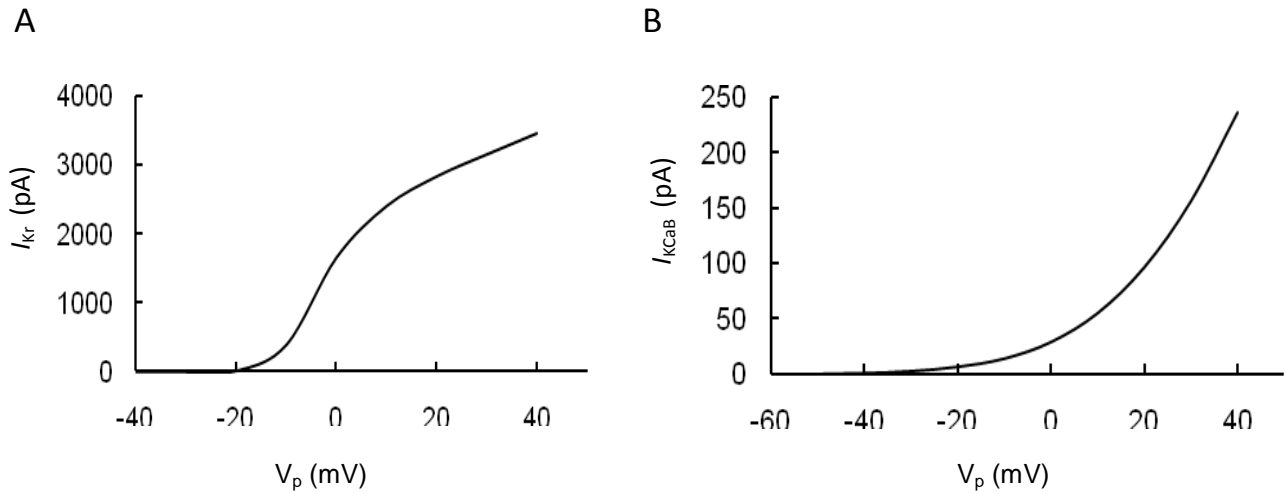

**Figure S4.  $K^+$  currents.** (A): Simulated peak  $I$ - $V$  relationship for delayed rectifier  $K^+$  current ( $I_{KDr}$ ). Voltage clamp pulses (500 ms) from  $-60$  mV to  $50$  mV from a holding potential of  $-70$  mV were simulated with parameters as in Table S2 to reproduce the experimental conditions (see Fig. 1 from<sup>8</sup>). (B): BK type  $K^+$  current ( $I_{KCaB}$ ). Simulated peak  $I$ - $V$  relationship of  $I_{KCaB}$  at  $[Ca^{2+}]_c = 0.1$   $\mu$ M. Voltage clamp pulses from  $-60$  mV to  $40$  mV from a holding potential of  $-70$  mV were simulated to reproduce the results of Fig. 2D from<sup>8</sup>).
